# Supplementary material
Source: publisher site journal article supplement (https://www.dovepress.com/article/400667)
Supplement: Supplementary file 1 [file get_supplementary_file.php]

**Supplementary**

**Table 1** Full results for association between all relevant variables and mobility status

| Characteristics | Total N (%) | Mobility status | | p- valuea | ORadj (95%CI) b | p*-*value (LR Test) |
| --- | --- | --- | --- | --- | --- | --- |
| Non-mover | Mover |
| Overall | 180 (100) | 103 (57.2) | 77 (42.8) |  |  |  |
| **Model I** |  |  |  |  |  |  |
| Household with CHE |  |  |  |  |  |  |
| No | 87 (48.3) | 57 (55.3) | 30 (39.0) | 0.043 | ref | 0.017 |
| Yes | 93 (51.7) | 46 (44.7) | 47 (61.0) |  | 2.2 (1.1, 4.1) |  |
| ***Covariates*** |  |  |  |  |  |  |
| Number of students in household |  |  |  |  |  |  |
| 0 or 1 | 122 (67.8) | 76 (73.8) | 46 (59.7) | 0.046 | ref | 0.029 |
| 2 or more | 58 (32.2) | 27 (26.2) | 31 (40.3) |  | 2.1 (1.1, 3.9) |  |
| Number of employed household members |  |  |  |  |  |  |
| 2 or more | 119 (66.1) | 73 (70.9) | 46 (59.7) | 0.161 | ref | 0.159 |
| 1 | 61(33.9) | 30 (29.1) | 31 (40.3) |  | 1.6 (0.8, 3.0) |  |
| Family with TPAP |  |  |  |  |  |  |
| Yes | 35 (19.4) | 24 (23.3) | 11 (14.3) | 0.186 | ref | 0.067 |
| No | 145 (80.6) | 79 (76.7) | 66 (85.7) |  | 2.1 (0.9, 4.8) |  |
| Education level of patients |  |  |  |  |  |  |
| Primary school or less | 55(30.6) | 28 (27.2) | 27 (35.1) | 0.111 | ref | 0.290 |
| Middle school | 56 (31.1) | 32 (31.1) | 24 (31.2) |  | 0.9 (0.4, 2.1) |  |
| High school | 50 (27.8) | 35 (34.0) | 15 (19.5) |  | 0.5 (0.2, 1.2) |  |
| University | 19 (10.6) | 8 (7.8) | 11 (14.3) |  | 1.3 (0.4, 4.0) |  |
| **Model II** |  |  |  |  |  |  |
| Household with CTC |  |  |  |  |  |  |
| No | 35 (19.4) | 26 (25.2) | 9 (11.7) | 0.037 | ref | 0.024 |
| Yes | 145 (80.6) | 77 (74.8) | 68 (88.3) |  | 2.6 (1.1, 6.3) |  |
| ***Covariates*** |  |  |  |  |  |  |
| Number of students in household |  |  |  |  |  |  |
| 0 or 1 | 122 (67.8) | 76 (73.8) | 46 (59.7) | 0.046 | ref | 0.062 |
| 2 or more | 58 (32.2) | 27 (26.2) | 31 (40.3) |  | 1.9 (1.0, 3.7) |  |
| Number of employed household members |  |  |  |  |  |  |
| 2 or more | 119 (66.1) | 73 (70.9) | 46 (59.7) | 0.161 | ref | 0.142 |
| 1 | 61(33.9) | 30 (29.1) | 31 (40.3) |  | 1.6 (0.9, 3.2) |  |
| Family with TPAP |  |  |  |  |  |  |
| Yes | 35 (19.4) | 24 (23.3) | 11 (14.3) | 0.186 | ref | 0.084 |
| No | 145 (80.6) | 79 (76.7) | 66 (85.7) |  | 2.0 (0.9, 4.7) |  |
| Education level of patients |  |  |  |  |  |  |
| Primary school or less | 55(30.6) | 28 (27.2) | 27 (35.1) | 0.111 | ref | 0.127 |
| Middle school | 56 (31.1) | 32 (31.1) | 24 (31.2) |  | 0.7 (0.3, 1.6) |  |
| High school | 50 (27.8) | 35 (34.0) | 15 (19.5) |  | 0.4 (0.2, 1.0) |  |
| University | 19 (10.6) | 8 (7.8) | 11 (14.3) |  | 1.2(0.4, 3.7) |  |
| **Variables with a *p* value > 0.2 by univariate analysisc** | | | | | | |
| Household area of  residence |  |  |  | 0.679 | ─ | ─ |
| Urban | 36 (20.0) | 19 (18.4) | 17 (22.1) |  |  |  |
| Rural | 144 (80.0) | 84 (81.6) | 60 (77.9) |  |  |  |
| Primary income earner in household |  |  |  |  |  |  |
| Others | 88 (48.9) | 55 (53.4) | 33 (42.9) | 0.212 | ─ | ─ |
| Patient | 92 (51.1) | 48 (46.6) | 44 (57.1) |  |  |  |
| Gender of patients |  |  |  |  |  |  |
| Female | 65(36.1) | 33 (32) | 32 (41.6) | 0.247 | ─ | ─ |
| Male | 115(63.9) | 70 (68) | 45 (58.4) |  |  |  |
| Age (years) of patients |  |  |  |  |  |  |
| ≤ 25 | 43 (23.9) | 24 (23.3) | 19 (24.7) | 0.333 | ─ | ─ |
| 25 - 59 | 120 (66.7) | 72 (69.9) | 48 (62.3) |  |  |  |
| ≥ 60 | 17 (9.4) | 7 (6.8) | 10 (13.0) |  |  |  |
| Marital status of patients |  |  |  |  |  |  |
| Single | 70 (38.9) | 38 (36.9) | 32 (41.6) | 0.631 | ─ | ─ |
| Married | 110 (61.1) | 65 (63.1) | 45 (58.4) |  |  |  |

**Notes:**

Model I and Model II separate analyses by CHE and CTC with other covariates adjusted

a Univariate analysis; b Multivariate logistic regression analysis; c Variables with a *p* value > 0.2 by univariate analysis and not be included in the multivariate logistic regression modelling process.

**Abbreviations:** CHE, catastrophic health expenditure; CTC, catastrophic total cost; ORadj, adjusted odds ratio; CI, confidence interval; LR test, likelihood ratio test; ref, reference group;

TPAP, targeted poverty alleviation program; MDR-TB, Multidrug-resistant tuberculosis.

**Supplementary**

**Table 2** Full results for association between all relevant variables and LTFU

| Characteristics | Total N (%) | LTFU | | p-valuea | ORadj (95%CI)b | p-value (LR Test) |
| --- | --- | --- | --- | --- | --- | --- |
| Yes (n, %) | No (n, %) |
| Overall | 180 (100) | 36 (20.0) | 144 (80.0) |  |  |  |
| **Model I** |  |  |  |  |  |  |
| Household with CHE |  |  |  |  |  |  |
| No | 87 (48.3) | 7 (19.4) | 80 (55.6) | 0.001 | ref | 0.002 |
| Yes | 93 (51.7) | 29 (80.6) | 64 (44.4) |  | 4.1 (1.6, 10.5) |  |
| Mobility status of patients |  |  |  |  |  |  |
| Non-mover | 103 (57.2) | 8 (22.2) | 95 (66.0) | 0.001 | ref | 0.001 |
| Mover | 77 (42.8) | 28 (77.8) | 49 (34.0) |  | 6.1 (2.5, 14.8) |  |
| ***Covariates*** |  |  |  |  |  |  |
| Primary income earner in household |  |  |  |  |  |  |
| Others | 88 (48.9) | 10 (27.8) | 78 (54.2) | 0.008 | ref | 0.038 |
| Patient | 92 (51.1) | 26 (72.2) | 66 (45.8) |  | 2.5 (1.0, 5.9) |  |
| Number of students in household |  |  |  |  |  |  |
| 0 or 1 | 122 (67.8) | 19 (52.8) | 103 (71.5) | 0.051 | ref | 0.059 |
| 2 or more | 58 (32.2) | 17 (47.2) | 41 (28.5) |  | 2.5 (1.0, 6.7) |  |
| Age (years) of patients |  |  |  |  |  |  |
| ≤ 25 | 43 (23.9) | 5 (13.9) | 38 (26.4) | 0.110 | ref | 0.610 |
| 25 - 59 | 120 (66.7) | 25 (69.4) | 95 (66.0) |  | 1.4 (0.3, 7.4) |  |
| ≥ 60 | 17 (9.4) | 6 (16.7) | 11 (7.6) |  | 2.9 (0.3, 31.2) |  |
| Marital status of patients |  |  |  |  |  |  |
| Single | 70 (38.9) | 10 (27.8) | 60 (41.7) | 0.181 | ref | 0.805 |
| Married | 110 (61.1) | 26 (72.2) | 84 (58.3) |  | 1.2 (0.3, 4.4) |  |
| Education level of patients |  |  |  |  |  |  |
| Primary school or less | 55(30.6) | 15 (41.7) | 40 (27.8) | 0.167 | ref | 0.163 |
| Middle school | 56 (31.1) | 9 (25.0) | 47 (32.6) |  | 0.8 (0.2, 2.5) |  |
| High school | 50 (27.8) | 11 (30.6) | 39 (27.1) |  | 2.1 (0.6, 7.7) |  |
| University | 19 (10.6) | 1 (2.8) | 18 (12.5) |  | 0.3 (0.1, 3.1) |  |
| **Model II** |  |  |  |  |  |  |
| Household with CTC |  |  |  |  |  |  |
| No | 35(19.4) | 2 (5.6) | 33 (22.9) | 0.034 | ref | 0.022 |
| Yes | 145(80.6) | 34 (94.4) | 111 (77.1) |  | 4.8 (1.0, 22.9) |  |
| Mobility status of patients |  |  |  |  |  |  |
| Non-mover | 103 (57.2) | 8 (22.2) | 95 (66.0) | 0.001 | ref | 0.001 |
| Mover | 77 (42.8) | 28 (77.8) | 49 (34.0) |  | 7.4 (3.0, 18.7) |  |
| ***Covariates*** |  |  |  |  |  |  |
| Primary income earner in household |  |  |  |  |  |  |
| Others | 88 (48.9) | 10 (27.8) | 78 (54.2) | 0.008 | ref | 0.032 |
| Patient | 92 (51.1) | 26 (72.2) | 66 (45.8) |  | 2.7 (1.1, 6.6) |  |
| Number of students in household |  |  |  |  |  |  |
| 0 or 1 | 122 (67.8) | 19 (52.8) | 103 (71.5) | 0.051 | ref | 0.172 |
| 2 or more | 58 (32.2) | 17 (47.2) | 41 (28.5) |  | 1.9 (0.8, 4.5) |  |
| Age (years) of patients |  |  |  |  |  |  |
| ≤ 25 | 43 (23.9) | 5 (13.9) | 38 (26.4) | 0.110 | ref | 0.335 |
| 25 - 59 | 120 (66.7) | 25 (69.4) | 95 (66.0) |  | 1.9 (0.4, 9.9) |  |
| ≥ 60 | 17 (9.4) | 6 (16.7) | 11 (7.6) |  | 4.6 (0.5, 38.7) |  |
| Marital status of patients |  |  |  |  |  |  |
| Single | 70 (38.9) | 10 (27.8) | 60 (41.7) | 0.181 | ref | 0.863 |
| Married | 110 (61.1) | 26 (72.2) | 84 (58.3) |  | 1.1 (0.3, 4.0) |  |
| Education level of patients |  |  |  |  |  |  |
| Primary school or less | 55(30.6) | 15 (41.7) | 40 (27.8) | 0.167 | ref | 0.083 |
| Middle school | 56 (31.1) | 9 (25.0) | 47 (32.6) |  | 0.6 (0.2, 1.5) |  |
| High school | 50 (27.8) | 11 (30.6) | 39 (27.1) |  | 1.5 (0.5, 4.3) |  |
| University | 19 (10.6) | 1 (2.8) | 18 (12.5) |  | 0.2 (0.1, 1.7) |  |
| **Variables with a *p* value > 0.2 by univariate analysisc** | | | | | | |
| Household area of residence |  |  |  |  |  |  |
| Urban | 36 (20.0) | 5 (13.9) | 31 (21.5) | 0.428 | ─ | ─ |
| Rural | 144 (80.0) | 31 (86.1) | 113 (78.5) |  |  |  |
| Number of employed household members |  |  |  |  |  |  |
| 2 or more | 119 (66.1) | 21 (58.3) | 98 (68.1) | 0.365 | ─ | ─ |
| 1 | 61(33.9) | 15 (41.7) | 46 (31.9) |  |  |  |
| Family with TPAP |  |  |  |  |  |  |
| Yes | 35 (19.4) | 8 (22.2) | 27 (18.8) | 0.814 |  |  |
| No | 145 (80.6) | 28 (77.8) | 117 (81.2) |  | ─ | ─ |
| Gender of patients |  |  |  |  |  |  |
| Female | 65(36.1) | 12 (33.3) | 53 (36.8) | 0.846 |  |  |
| Male | 115(63.9) | 24 (66.7) | 91 (63.2) |  | ─ | ─ |

**Notes:**

Model I and Model II separate analyses by CHE and CTC with other covariates adjusted

a Univariate analysis; b Multivariate logistic regression analysis; c Variables with a *p* value > 0.2 by univariate analysis and not be included in the multivariate logistic regression modelling process

**Abbreviations:** LTFU, lost to follow up; CHE, catastrophic health expenditure; CTC, catastrophic total cost; ORadj, adjusted odds ratio; CI, confidence interval; LR test, likelihood ratio test; ref, reference group; TPAP, targeted poverty alleviation program; MDR-TB, Multidrug-resistant tuberculosis.
